# Supplementary material for: Two-Dimensional Biodegradable Black Phosphorus Nanosheets Promote Large Full-Thickness Wound Healing through In Situ Regeneration Therapy
Source: PubMed Central journal article supplement — ACS Nano. 2024 Jan 16;18(4):3553–74. doi: 10.1021/acsnano.3c11177 (PMC10832999; doi:10.1021/acsnano.3c11177), 2024-01-16
Supplement: nn3c11177_si_001.pdf [file nn3c11177_si_001.pdf]

# Two-dimensional Biodegradable Black Phosphorus Nanosheets Promote Large Full-thickness Wound Healing through in situ regeneration therapy

## *AUTHOR NAMES*

*Xueshan Bai<sup>1,‡</sup>, Renxian Wang<sup>2,3,‡</sup>, Xiaohua Hu<sup>5</sup>, Qiang Dai<sup>5</sup>, Jianxun Guo<sup>2</sup>, Tongyu Cao<sup>5</sup>, Weili Du<sup>5</sup>, Yuning Cheng<sup>2</sup>, Songxia Xia<sup>1</sup>, Dingding Wang<sup>3</sup>, Liya Yang<sup>1\*</sup>, Li Teng<sup>1\*</sup>, Dafu Chen<sup>2\*</sup>, Yajun Liu<sup>3,4\*</sup>*

## AUTHOR ADDRESS

1 Cranio-Maxillo-Facial Surgery Department, Plastic Surgery Hospital, Chinese Academy of Medical Sciences & Peking Union Medical College, Beijing, 100144, China

2 Laboratory of Bone Tissue Engineering, Beijing Laboratory of Biomedical Materials, National Center for Orthopaedics, Beijing Research Institute of Traumatology and Orthopaedics, Beijing Jishuitan Hospital, Capital Medical University, Beijing, 100035, China

3 JST sarcopenia Research Centre, National Center for Orthopaedics, Beijing Research Institute of Traumatology and Orthopaedics, Beijing Jishuitan Hospital, Capital Medical University, Beijing, 100035, China

4 Department of Spine Surgery, Beijing Jishuitan Hospital, National Center for Orthopaedics, Beijing Jishuitan Hospital, Capital Medical University, Beijing, 100035, China

5 Department of Burns and Plastic Surgery, Beijing Jishuitan Hospital, Capital Medical University, Beijing, 100035, China



Supporting Information.

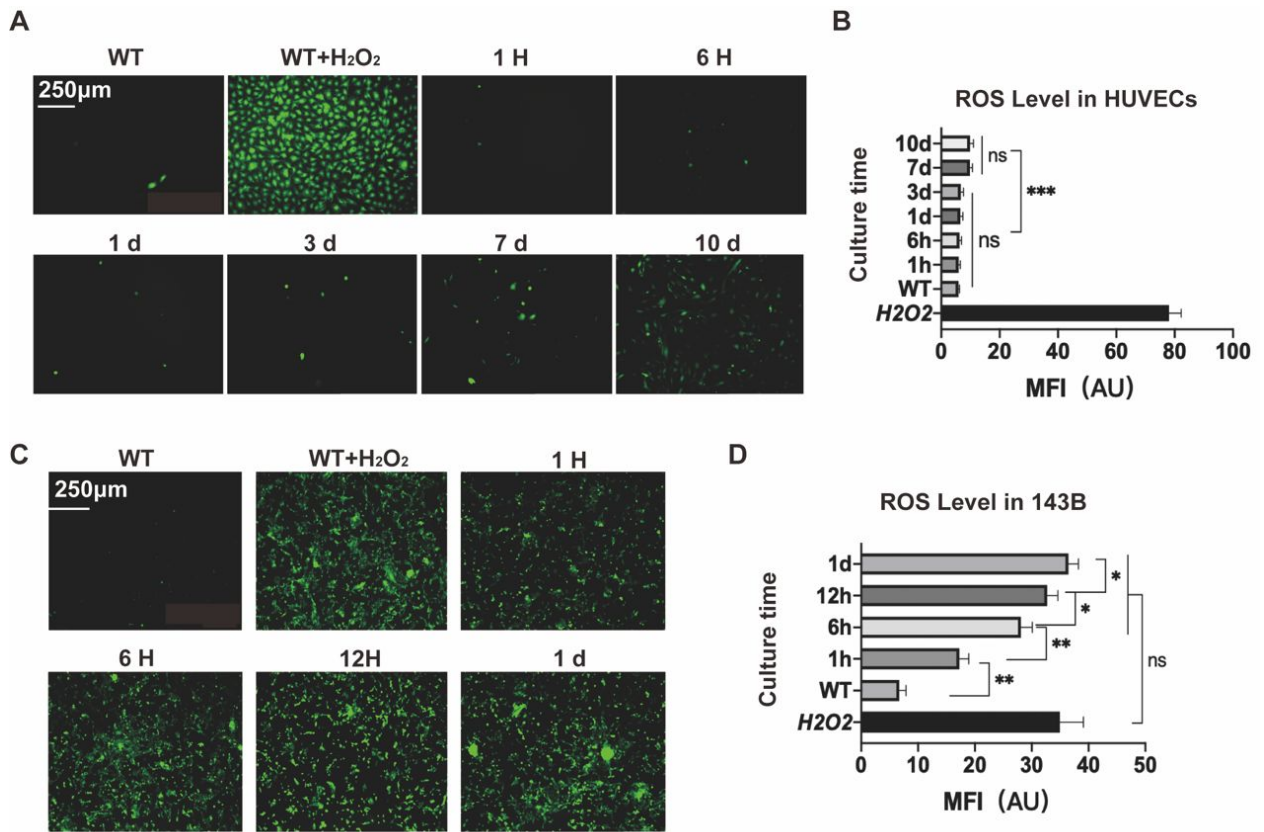

Figure S1. BPNS' ROS-mediated mechanism. (A) Intracellular ROS level in HUVECs co-cultured with BPNS for different times. Scale Bar: 250μm. (B) Quantitative results of ROS level MFI analysis in HUVECs. (C) Intracellular ROS level in 143B cultured with BPNS for different times. Scale Bar: 250μm. (D) Quantitative results of ROS level MFI analysis in 143B. \* $p < 0.05$ , \*\* $p < 0.01$ , \*\*\* $p < 0.001$ , ns: not significant.

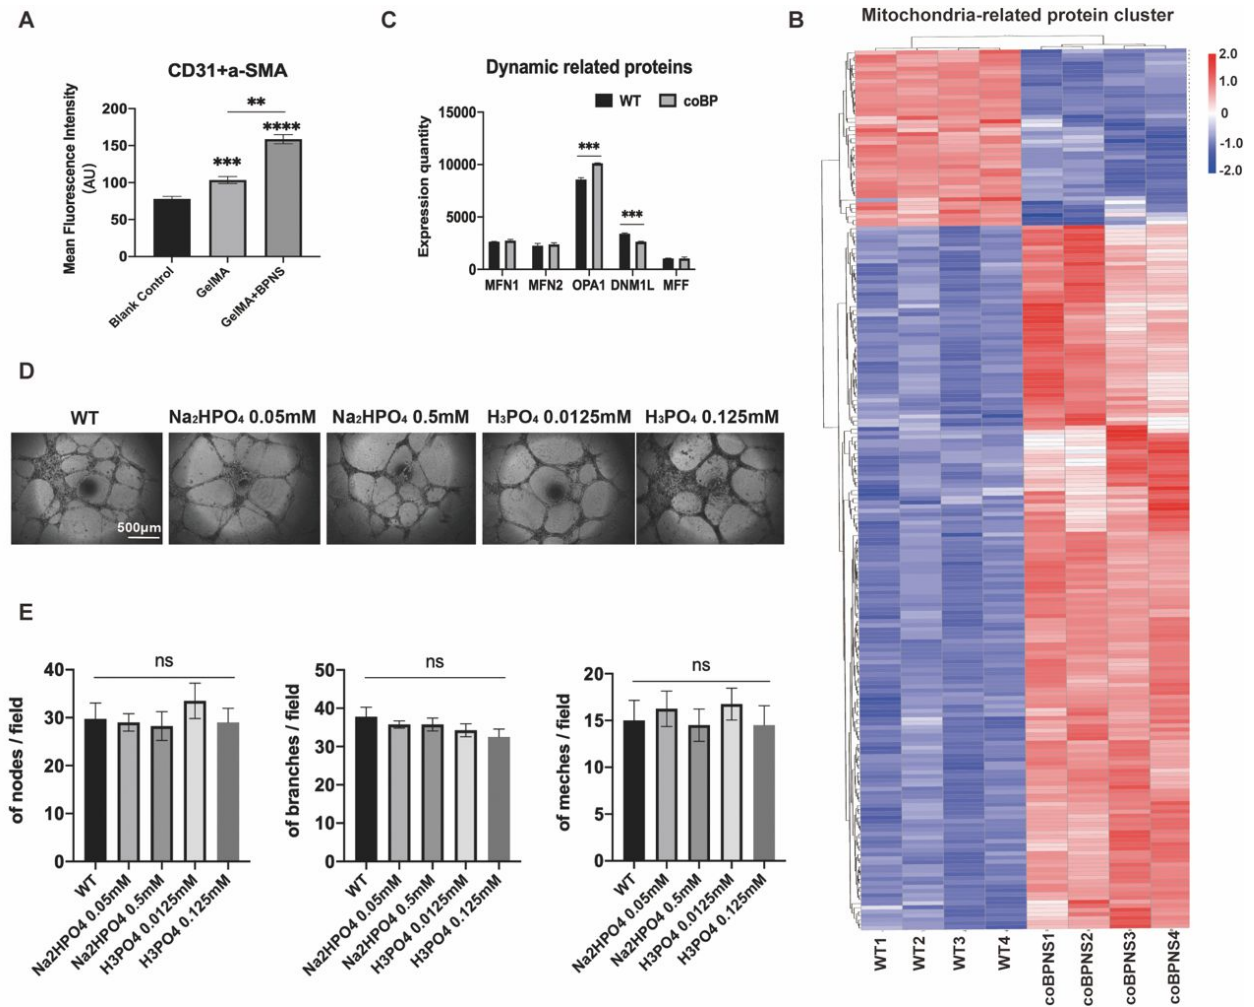

Figure S2. (A) Quantitative results of CD31 and a-SMA MFI analysis in vivo. (B) the clustering heatmap of mitochondrion-related proteins expression. (C) Expression of mitochondrial dynamic related proteins in proteomic. (E) Tube formation assays of HUVECs co-cultured with different concentrations of H<sub>3</sub>PO<sub>4</sub> and Na<sub>2</sub>HPO<sub>4</sub>. Scale Bar: 500μm. (F) Quantitative results of tube formation assays of HUVECs co-cultured with varying concentrations of H<sub>3</sub>PO<sub>4</sub> and Na<sub>2</sub>HPO<sub>4</sub>.

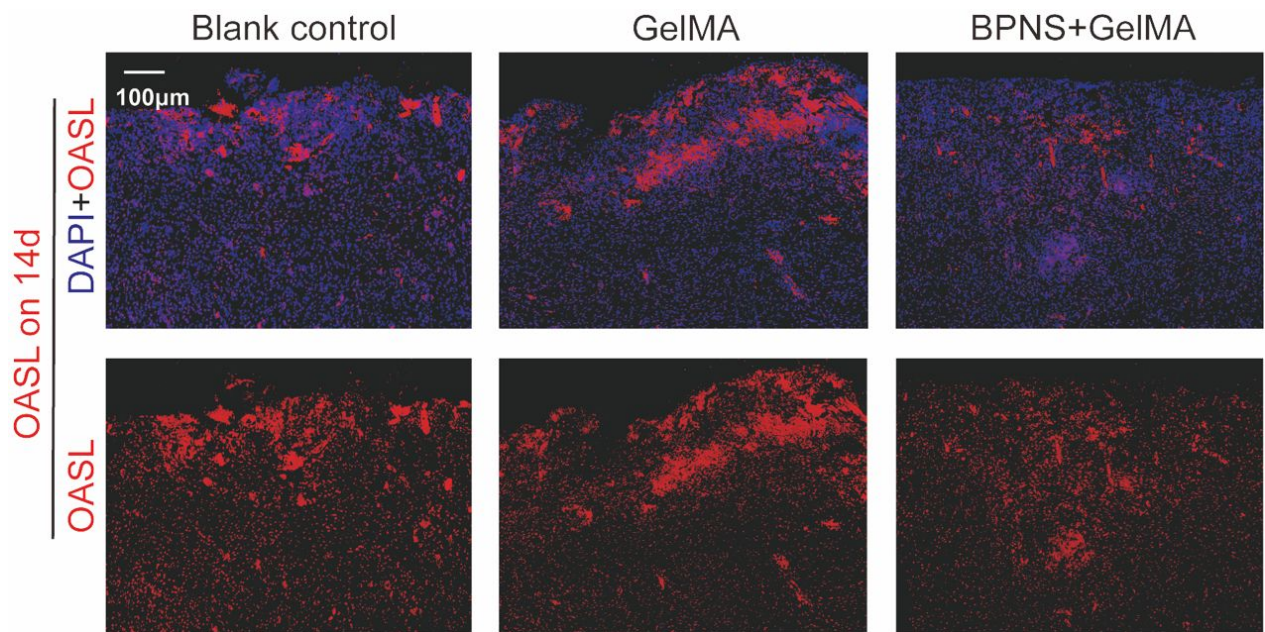

Figure S3. The expression of OASL in vivo on day 14. On day 14, the blank control and GelMA groups significantly expressed OASL in the superficial layer, whereas the GelMA/BPNS group presented it in the deep dermis.

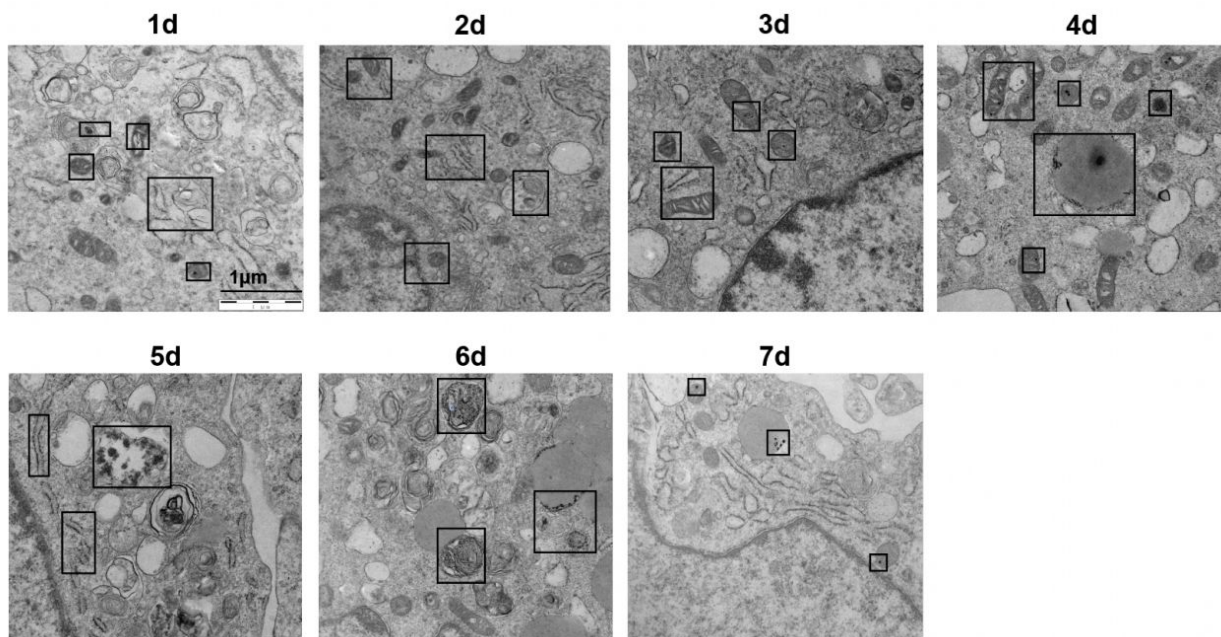

Figure S4. The distribution and degradation of BPNS in ECs for seven days. There is no significant accumulation of BPNS in mitochondria. Scale Bar: 1 μm.

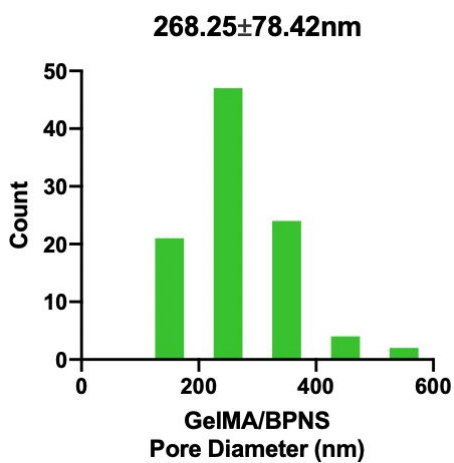

Figure S5. Pore diameter analysis of 20w/v% GelMA/BPNS showed the mean size of pore is 268.25 ± 78.42nm.
